# Supplementary material for: Identifying Malnutrition Risk Factors: A Comparative Analysis of Malnutrition Diagnostic Tools
Source: Research Square preprint supplement (doi:10.21203/rs.3.rs-7179279/v1), 2025-10-06
Supplement: Supplementary file 1 [file 2176a3e0bcadf775f737eed6.docx]

| Table 5. Comparison of Malnutrition Risk-Factors Identified with the Combinations of the Three Diagnostic Tools | | | |
| --- | --- | --- | --- |
| Combinations Malnutrition Diagnostic Criteria in ESPEN, AND/ASPEN, and GLIM | | Malnutrition Risk Factors | Odds Ratio, 95% CI, p-value |
| ESPEN | satisfaction of either ESPEN-1 or ESPEN-2 criteria | Females | OR=2.243, 95% CI 1.070 -4.701, p=0.032 |
| Higher CCI | OR=1.217, 95% CI 1.046 -1.416, p=0.011 |
| ESPEN-1 | BMI <18.5 kg/m2 | Females | OR=1.500, 95% CI 1.231-16.318, p=0.023 |
| Higher CCI | OR=1.329, 95% CI 1.089 -1.625, p=0.006 |
| Absence of Caregiver | OR=0.281, 95% CI 0.097-0.812, p=0.019 |
| Polypharmacy | OR=0.237, 95% CI 0.072-0.775, p=0.017 |
| ESPEN-2 | unintentional weight loss+ low BMI-for-age | CCI | OR=1.220, 95% CI 1.034-1.440, p=0.018 |
| AND/ASPEN | unintentional weight loss+ decreased food intake | Females | OR=2.133, 95% CI 1.310-3.471, p=0.002 |
| Higher CCI | OR=1.285, 95% CI 1.148-1.439, p<0.001 |
| Presence of Pressure Ulcers | OR=13.058, 95% CI 2.897-58.861, p=0.001 |
| Admission to wards other than internal medicine and surgery | OR=0.053, 95% CI 0. 006-0. 492, p=0.010 |
| GLIM | satisfaction of either GLIM-1 or GLIM-2 criteria | Females | OR=2.015, 95% CI 1.230-3.302, p=0.005 |
| Higher CCI Score | OR=1.266, 95% CI 1.130-1.419, p<0.001 |
| Presence of Pressure Ulcers | OR: 13.325, 95%CI 3.049-58.235, p<0.001 |
| Admission to wards other than internal medicine and surgery | OR: 0.057, 95%CI: 0.006-0.517, p=0.011 |
| GLIM-1 | unintentional weight loss+ reduced food assimilation or absorption | Females | OR=2.602, 95% CI 1.181-5.735, p=0.018 |
| Higher CCI Score | OR=1.179, 95% CI 1.005-1.382, p=0.043 |
| Presence of Pressure Ulcers | OR: 14.822, 95%CI 3.389-64.825, p<0.001 |
| Admission to wards other than internal medicine and surgery | OR: 0.059, 95%CI: 0.006-0.531, p=0.012 |
| GLIM-2 | low BMI-for age+ reduced food assimilation or absorption | Females | OR=2.602, 95% CI 1.181-5.735, p=0.018 |
| Higher CCI Score | OR=1.179, 95% CI 1.005-1.382, p=0.04 |
| AND/ASPEN: Academy of Nutrition and Dietetics/American Society of Parenteral and Enteral Nutrition; ESPEN: European Society of Clinical Nutrition and Metabolism; GLIM Global Leadership Initiative on Malnutrition | | | |
