# Supplementary material for: Identifying Malnutrition Risk Factors: A Comparative Analysis of Malnutrition Diagnostic Tools
Source: Research Square preprint supplement (doi:10.21203/rs.3.rs-7179279/v1), 2025-10-06
Supplement: Supplementary file 2 [file 3bb8a88e627630b38ffb15b7.docx]

| Table 1. Combinations of Indicators in Each of the Criteria of AND/ASPEN, ESPEN, and GLIM | |
| --- | --- |
| ESPEN | ESPEN: the satisfaction of either ESPEN-1 or ESPEN-2 criteria |
| ESPEN-1 | ESPEN-1: Body Mass Index (BMI) <18.5 kg/m2 |
| ESPEN-2 | ESPEN-2: **unintentional weight loss** (defined as unintentional weight loss >5% over 3 months or >10% in a period indefinite time) combined with **low BMI-for-age** (if age of patient <70 years and BMI<20 kg/m2, or if age of patient ≥70 years and BMI<22 kg/m2) |
| AND/ASPEN | AND/ASPEN: **unintentional weight loss** (1-2 kg, >2 kg in 1 week; ≥5 kg in 1 month, ≥7.5 kg in 3 months; ≥10 kg in 6 months; ≥20 kg in 1 year) combined with **decreased food intake** (<75% of energy needs in a period >7 days, ≥1 month, or ≥ 3 months; ≤50% of energy needs in a period of time ≥5 days or ≥1 month; ≤75% of energy needs in a period of time ≥1 month) |
| GLIM | GLIM: the satisfaction of either GLIM-1 or GLIM-2 criteria |
| GLIM-1 | GLIM-1: **unintentional weight loss** (> 5% in the past 6 months or >10% for a period >6 months) combined with **reduced food assimilation or absorption** (≤50% of energy needs in a period > 1 week; any reduction in food intake for >2 weeks; or presence of a chronic gastrointestinal condition that impacts food assimilation and/or absorption) |
| GLIM-2 | GLIM-2: **low BMI-for age** (if age of patient <70 years and BMI<20 kg/m2; if age of patient >70 years and BMI<22 kg/m2; *Asia*: if age of patient <70 years and BMI<18.5 kg/m2; or if age of patient >70 years and BMI<20 kg/m2)combined with **reduced food assimilation or absorption** (≤50% of energy needs in a period > 1 week; any reduction in food intake for >2 weeks; or presence of a chronic gastrointestinal condition that impacts food assimilation and/or absorption) |
| AND/ASPEN: Academy of Nutrition and Dietetics/American Society of Parenteral and Enteral Nutrition9; ESPEN: European Society of Clinical Nutrition and Metabolism10; GLIM Global Leadership Initiative on Malnutrition8 | |
