# Supplementary material for: Identifying Malnutrition Risk Factors: A Comparative Analysis of Malnutrition Diagnostic Tools
Source: Research Square preprint supplement (doi:10.21203/rs.3.rs-7179279/v1), 2025-10-06
Supplement: Supplementary file 3 [file 51db3cddcc69aeeeb7b3fb6b.docx]

| Table 3. Logistic Regression Models of Malnutrition Risk Factor with the Academy of Nutrition and Dietetics/American Society of Parenteral and Enteral Nutrition (AND/ASPEN) Malnutrition Diagnostic Tool | | | | | |
| --- | --- | --- | --- | --- | --- |
|  | Beta | OR | 95% CI | | p-value |
|  |  |  | Lower Limit | Upper Limit |  |
| **Model-1 (Cox and Snell=0.153)** | | | | | |
| Age | 0.003 | 1.003 | 0.985 | 1.022 | 0.721 |
| **Model-2 (Cox and Snell=0.182)** | | | | | |
| Sex  Female | 0.821 | 2.274 | 1.357 | 3.810 | 0.002* |
| Socioeconomic status (/year)  6000$-12000$  12000$-15000$  >15000$ |  |  |  |  | 0.838 |
| 0.28 | 1.028 | 0.425 | 2.487 | 0.951 |
| -0.95 | 0.910 | 0.348 | 2.380 | 0.847 |
| -0.297 | 0.743 | 0.273 | 2.026 | 0.562 |
| Educational status  Attended school  Highschool degree  University degree |  |  |  |  | 0.057 |
| -0.868 | 0.420 | 0.127 | 1.391 | 0.156 |
| -0.25 | 0.975 | 0.290 | 3.277 | 0.967 |
| -0.549 | 0.578 | 0.159 | 2.101 | 0.405 |
| Admission Unit  Internal Medicine  Surgery  Others |  |  |  |  | 0.082 |
| -0.381 | 0.683 | 0.286 | 1.632 | 0.391 |
| -0.363 | 0.695 | 0.258 | 1.875 | 0.473 |
| -2.936 | 0.053 | 0.006 | 0.492 | 0.010* |
| Polypharmacy  ≥5 drugs/day | 0.556 | 1.743 | 0.740 | 4.109 | 0.204 |
| Braden Score  Risk (Mild, moderate, high and very high) | 0.318 | 1.374 | 0.793 | 2.379 | 0.257 |
| Number of Medications | -0.165 | 0.848 | 0.710 | 1.012 | 0.068 |
| CCI score | 0.245 | 1.278 | 1.131 | 1.444 | <0.0001* |
| Pressure Ulcer  Presence of Pressure Ulcers | 2.569 | 13.058 | 2.897 | 58.861 | 0.001* |

*statistical significance p<0.05

CCI, Charlson Comorbidity Index
