# Supplementary material for: Identifying Malnutrition Risk Factors: A Comparative Analysis of Malnutrition Diagnostic Tools
Source: Research Square preprint supplement (doi:10.21203/rs.3.rs-7179279/v1), 2025-10-06
Supplement: Supplementary file 4 [file 5306c9c3d6030dbc7278fd56.docx]

| Table 2. Logistic Regression Models of the Risk-Factors with European Society of Clinical Nutrition and Metabolism (ESPEN) | | | | | |
| --- | --- | --- | --- | --- | --- |
|  | Beta | OR | 95% CI | | p-value |
|  |  |  | Lower Limit | Upper Limit |  |
| **ESPEN** | | | | | |
| **Model-1 (Cox and Snell=0.065)** | | | | | |
| Age | 0.018 | 1.019 | 0.992 | 1.045 | 0.068 |
| **Model-2 (Cox and Snell=0.073)** | | | | | |
| Sex  Females | 0.808 | 2.243 | 1.070 | 4.701 | 0.032* |
| Educational status  Attended school  Highschool degree  University degree |  |  |  |  | 0.522 |
| -0.973 | 0.378 | 0.096 | 1.496 | 0.166 |
| -0.627 | 0.534 | 0.142 | 2.015 | 0.355 |
| -0.902 | 0.406 | 0.406 | 0.097 | 0.215 |
| Admission Unit  Internal Medicine  Surgery  Others |  |  |  |  | 0.340 |
| -0.663 | 0.515 | 0.189 | 1.402 | 0.194 |
| -1.241 | 0.289 | 0.076 | 1.095 | 0.068 |
| -19.364 | 0.000 | -- | -- | 0.998 |
| CCI score | 0.197 | 1.217 | 1.046 | 1.416 | 0.011* |
| Braden Score  Risk (Mild, moderate, high and very high) | 0.979 | 2.663 | 1.212 | 0.554 | 2.650 |
| Pressure Ulcer  Presence of Pressure Ulcers | 0.979 | 2.663 | 0.672 | 10.557 | 0.163 |
| **ESPEN-1(Cox and Snell=0.066)** | | | | | |
| Sex  Female | 1.500 | 4.482 | 1.231 | 16.318 | 0.023* |
| Presence/absence of a caregiver  Absence of caregiver | -1.269 | 0.281 | 0.097 | 0.812 | 0.019* |
| Educational status  Attended school  Highschool degree  University degree |  |  |  |  | 0.318 |
| -1.379 | 0.252 | 0.041 | 1.534 | 0.135 |
| -1.376 | 0.253 | 0.047 | 1.369 | 0.111 |
| -0.700 | 0.497 | 0.092 | 2.683 | 0.416 |
| Admission Unit  Internal Medicine  Surgery  Others |  |  |  |  | 0.444 |
| -0.681 | 0.506 | 0.125 | 2.042 | 0.339 |
| -1.644 | 0.193 | 0.027 | 1.386 | 0.102 |
| -19.169 | 0.000 | -- | -- | 0.997 |
| CCI score | 0.284 | 1.329 | 1.089 | 1.625 | 0.006* |
| Polypharmacy  ≥ 5 drugs/day | -1.441 | 0.237 | 0.072 | 0.775 | 0.017* |
| Age | 0.015 | 3.891 | 1.161 | 13.036 | 0.274 |
| **ESPEN-2** | | | | | |
| **Model-1 (Cox and Snell=0.067)** | | | | | |
| Age | 0.019 | 1.020 | 0.990 | 1.050 | 0.195 |
| **Model-2 (Cox and Snell=0.074)** | | | | | |
| Sex  Female | 0.622 | 1.862 | 0.842 | 4.114 | 0.124 |
| Educational status  Attended school  Highschool degree  University degree |  |  |  |  | 0.135 |
| -1.295 | 0.274 | 0.066 | 1.142 | 0.075 |
| -0.668 | 0.513 | 0.134 | 1.963 | 0.329 |
| -1.495 | 0.224 | 0.048 | 1.039 | 0.056 |
| Admission Unit  Internal Medicine  Surgery  Others |  |  |  |  | 0.405 |
| -0.703 | 0.495 | 0.170 | 1.438 | 0.196 |
| -1.247 | 0.287 | 0.067 | 1.229 | 0.093 |
| -19.173 | 0.000 | -- | -- | 0.998 |
| CCI score | 0.199 | 1.220 | 1.034 | 1.440 | 0.018* |
| Braden Score  Risk (Mild, moderate, high and very high) | 0.079 | 1.082 | 0.457 | 2.564 | 0.858 |
| Pressure Ulcer  Presence of Pressure Ulcers | 1.174 | 3.236 | 0.786 | 13.326 | 0.104 |
| *statistical significance p<0.05  CCI, Charlson Comorbodity Index | | | | | |
