# Supplementary material for: Identifying Malnutrition Risk Factors: A Comparative Analysis of Malnutrition Diagnostic Tools
Source: Research Square preprint supplement (doi:10.21203/rs.3.rs-7179279/v1), 2025-10-06
Supplement: Supplementary file 5 [file be21494dee88bf2d19518675.docx]

Table 1. Bivariate Analysis of Malnutrition Risk-Factors with the Malnutrition Screening Tools: Nutritional Screening Tools Mini-Nutritional Assessment Short Form (MNA-SF) or Nutrition Risk Screening 2002 (NRS-2002)

|  | Normal Nutritional  Status | Nutritionally at Risk | p-value |
| --- | --- | --- | --- |
| Age1, Mean ± SD | 61.69±17.56 | 68.45±16.37 | <0.001* |
| CCI1, Mean ± SD | 3.00±2.34 | 5.14±2.53 | <0.001* |
| Number of Medications1, Mean ± SD | 3.90±2.70 | 4.60±2.09 | 0.001* |
| Sex2 [n(%)] |  |  | 0.003* |
| Males | 234 (51.5) | 45(36.3) |
| Females | 220 (48.5) | 79(63.7) |
| Presence/absence of a caregiver2, [n(%)] |  |  | 0.226 |
| Absence of caregiver | 100 (22.2) | 34(27.4) |
| Presence of caregiver | 350 (77.8) | 90 (72.6) |
| Socioeconomic Status2, [n(%)] |  |  | 0.124 |
| < 6,000$ | 35(8.9) | 12(10.5) |
| 6,000-12,000$ | 126(32.1) | 49(43.0) |
| 12,000-15,000$ | 119(30.3) | 27(23.7) |
| >15,000$ | 113(28.8) | 26(22.8) |
| Educational Status2, [n(%)] |  |  | <0.001* |
| Illiterate | 13(2.9) | 8(6.6) |
| Attended School | 103(23.3) | 31(25.6) |
| Highschool Degree | 126(28.5) | 55(45.5) |
| University Degree | 200(45.2) | 27(22.3) |
| Admission Unit3, [n(%)] |  |  | <0.001* |
| Oncology | 26 (5.8) | 20(16.4) |
| Internal Medicine | 268(59.7) | 75(61.5) |
| Surgery | 114(25.4) | 26(21.3) |
| Others | 41(9.1) | 1(0.8) |
| Polypharmacy2, [n(%)] |  |  | <0.001* |
| <5 drugs/day | 275(60.6) | 52(41.9) |
| ≥ 5 drugs/day | 179(39.4) | 72(58.1) |
| Braden Score2, [n(%)] |  |  | 0.002* |
| No Risk | 284(67.1) | 60(51.7) |
| Risk (Mild, moderate, high and very high) | 139(32.9) | 56(48.3) |
| Pressure Ulcers3, [n(%)] |  |  | <0.001* |
| Absence of Pressure Ulcers | 424 (99.3) | 104(87.4) |
| Presence of Pressure Ulcers | 3(0.7) | 15(12.6) |

1Man-Whitney Test; 2 Pearson Chi-Square; 3Fisher Exact

*statistical significance p<0.05 CCI, Charlson Comorbidity Index

Table 2. Bivariate Analysis of Risk-Factors with European Society of Clinical Nutrition and Metabolism (ESPEN)

|  | ESPEN | | | ESPEN-1 | | | ESPEN-2 | | |
| --- | --- | --- | --- | --- | --- | --- | --- | --- | --- |
|  | Normal | Malnourished | p-value | Normal | Malnourished | p-value | Normal | Malnourished | p-value |
| Age1, Mean ± SD | 62.58±17.48 | 69.12±17.62 | 0.004* | 63.08±17.57 | 61.53±18.50 | 0.688 | 62.55±17.51 | 70.14±17.39 | 0.001* |
| CCI1, Mean ± SD | 3.30±2.47 | 5.49±2.49 | <0.001* | 3.39±2.50 | 5.00 ±3.07 | 0.018* | 3.30±2.48 | 5.64±2.46 | <0.001* |
| Number of Medications1 | 4.04±2.66 | 4.12±1.66 | 0.655 | 4.06±2.63 | 3.79±1.65 | 0.722 | 4.05±2.65 | 4.11±1.65 | 0.689 |
| Sex2,3 [n(%)] |  |  | 0.023* |  |  | 0.004* |  |  | 0.125 |
| Males | 265(49.5) | 14(32.6) | 276(49.5) | 3(15.8) | 265(49.2) | 13(35.1) |
| Females | 270(50.5) | 29(67.8) | 282(50.5) | 16(84.2) | 274(50.8) | 24(64.9) |
| Presence/absence of a caregiver2 [n(%)] |  |  | 0.267 |  |  | 0.050 |  |  | 0.894 |
| Absence of caregiver | 121 (22.8) | 13(30.2) | 126(22.7) | 8(42.1) | 125(23.4) | 9(24.3) |
| Presence of caregiver | 410 (77.2) | 30(69.8) | 428(77.3) | 11(57.9) | 410(76.6) | 28(75.7) |
| Socioeconomic status2,3 [n(%)] |  |  | 0.416 |  |  | 0.471 |  |  | 0.295 |
| < 6,000$ | 42(9.0) | 5(12.8) | 45(9.2) | 2(11.1) | 44(9.3) | 3(8.8) |
| 6,000-12,000$ | 158(22.5) | 17(43.6) | 166(33.9) | 9(50.0) | 158(33.5) | 17(50.0) |
| 12,000-15,000$ | 138(29.5) | 8(20.5) | 142(29.0) | 4(22.2) | 139(29.4) | 7(20.6) |
| >15,000$ | 130(27.8) | 9(23.1) | 136(27.8) | 3(16.7) | 131(27.8) | 7(20.6) |
| Educational Status2,3 [n(%)] |  |  | 0.008* |  |  | 0.087 |  |  | <0.001* |
| Illiterate | 16(3.1) | 5(11.9) | 18(3.3) | 3(15.8) | 16(3.0) | 5(13.9) |
| Attended School | 125(24.0) | 9(21.4) | 131(24.1) | 3(15.8) | 127(24.2) | 7(19.4) |
| Highschool Degree | 163(31.3) | 18(42.9) | 176(32.4) | 5(26.3) | 162(30.9) | 18(50.0) |
| University Degree | 217(41.7) | 10(3.8) | 218(40.1) | 8(42.1) | 220(41.9) | 6(16.7) |
| Admission Unit3 [n(%)] |  |  | <0.001* |  |  | 0.067 |  |  | 0.001* |
| Oncology | 36(6.8) | 10(23.3) | 41(7.4) | 4(21.2) | 36(6.8) | 9(24.3) |
| Internal medicine | 315(59.7) | 28(65.1) | 330(59.9) | 13(68.4) | 318(59.8) | 24(64.9) |
| Surgery | 135(25.6) | 5(11.6) | 138(25.0) | 2(10.5) | 136(25.6) | 4(10.8) |
| Others | 42(8.0) | 0(0.0) | 42(7.6) | 0(0.0) | 42(7.9) | 0(0.0) |
| Polypharmacy2 [n(%)] |  |  | 0.874 |  |  | 0.159 |  |  | 1.000 |
| <5 drugs/day | 302(56.4) | 25(58.1) | 312(55.9) | 14(73.7) | 305(56.6) | 21(56.8) |
| ≥ 5 drugs/day | 233(43.6) | 18(41.9) | 246(44.1) | 5(26.3) | 234(43.4) | 16(43.2) |
| Braden Score2 [n(%)] | 323(64.7) | 21(52.5) | 0.127 | 333(64.0) | 10(55.6) | 0.619 | 325(64.6) | 18(52.9) | 0.197 |
| No Risk |

| Risk (Mild, moderate, high and very  high) | 176(35.3) | 19(47.5) |  | 187(36.0) | 8(44.4) |  | 178(35.4) | 16(47.1) |  |
| --- | --- | --- | --- | --- | --- | --- | --- | --- | --- |
| Pressure Ulcers2,3 [n(%)] |  |  | 0.008* |  |  | 0.477 |  |  | 0.004* |
| Absence of Pressure Ulcers | 492(97.4) | 36(87.8) | 509(96.8) | 18(94.7) | 496(97.4) | 30(85.7) |
| Presence of Pressure Ulcers | 13(2.6) | 5(12.2) | 17(3.2) | 1(5.3) | 13(2.6) | 5(14.3) |

1 Man-Whitney Test; 2Pearson Chi-Square; 3Fisher Exact

*statistical significance p<0.05 CCI, Charlson Comorbidity Index

Table 3. Bivariate Analysis of Malnutrition Risk Factor with the Criteria of Academy of Nutrition and Dietetics/American Society of Parenteral and Enteral Nutrition (AND/ASPEN) Malnutrition Diagnostic Tool

|  | Normal | Malnourished | p-value |
| --- | --- | --- | --- |
| Age1 (years), Mean ± SD | 61.84±17.75 | 67.09±16.42 | 0.001* |
| CCI1, Mean ± SD | 3.06±2.39 | 4.77±2.61 | <0.001* |
| Number of Medications1, Mean ± SD | 3.93±2.71 | 4.46±2.16 | 0.009* |
| Sex2, [n(%)] |  |  | 0.13 |
| Males | 228(51.1) | 51(38.6) |
| Females | 218(48.9) | 81(61.4) |
| Presence/absence of a caregiver2, [n(%)] |  |  | 0.815 |
| Absence of caregiver | 102 (23.1) | 32(24.2) |
| Presence of caregiver | 340 (76.9) | 100(75.8) |
| Socioeconomic status2, [n(%)] |  |  | 0.196 |
| < 6,000$ | 35(9.1) | 12(9.9) |
| 6,000-12,000$ | 124(32.1) | 51(42.1) |
| 12,000-15,000$ | 116(30.1) | 30(24.8) |
| >15,000$ | 111(28.8) | 28(23.1) |
| Educational Status2, [n(%)] |  |  | 0.001* |
| Illiterate | 12(2.8) | 9(7.0) |
| Attended School | 103(23.7) | 31(24.0) |
| Highschool Degree | 127(29.3) | 54(41.9) |
| University Degree | 192(44.2) | 35(27.1) |
| Admission Unit3, [n(%)] |  |  | <0.001* |
| Oncology | 27(6.1) | 19(14.7) |
| Internal medicine | 262(59.3) | 81(62.8) |
| Surgery | 112(25.3) | 28(21.7) |
| Others | 41(9.3) | 1(0.8) |
| Polypharmacy2, [n(%)] |  |  | 0.002* |
| <5 drugs/day | 268(60.1) | 59(44.7) |
| ≥ 5 drugs/day | 178(39.9) | 73(55.3) |
| Braden Score2, [n(%)] |  |  | 0.014* |
| No Risk | 278(66.7) | 66(54.1) |
| Risk (Mild, moderate, high and very high) | 139(33.3) | 56(45.9) |
| Pressure Ulcers3, [n(%)] |  |  | <0.001* |
| Absence of Pressure Ulcers | 419(99.3) | 109(87.9) |
| Presence of Pressure Ulcers | 3(0.7) | 15(12.1) |

1 Man-Whitney Test; 2 Pearson Chi-Square; 3Fisher Exact

*statistical significance p<0.05 CCI, Charlson Comorbidity Index

Table 4. Bivariate Analysis of Malnutrition Risk-Factors with Global Leadership Initiative on Malnutrition (GLIM)

|  | GLIM | | | GLIM-1 | | | GLIM-2 | | |
| --- | --- | --- | --- | --- | --- | --- | --- | --- | --- |
|  | Normal | Malnourished | p-value | Normal | Malnourished | p-value | Normal | Malnourished | p-value |
| Age1, Mean ± SD | 61.67±17.76 | 67.61±16.23 | <0.001* | 61.82±17.75 | 67.35±16.33 | 0.001* | 62.48±17.51 | 70.28±17.08 | 0.001* |
| CCI1, ± SD | 3.02±2.36 | 4.90±2.60 | <0.001* | 3.05±2.39 | 4.87±2.57 | <0.001* | 3.30±2.47 | 5.45±2.63 | <0.001* |
| Medications1, ± SD | 3.94±2.71 | 4.42±2.14 | 0.016* | 3.93±2.71 | 4.49±2.12 | 0.007* | 4.06±2.65 | 3.85±1.73 | 0.726 |
| Sex2, [n(%)] |  |  | 0.006* |  |  | 0.016* |  |  | 0.014* |
| Males | 229(51.5) | 50(37.6) | 229(50.9) | 49(38.6) | 267(49.8) | 12(29.3) |
| Females | 216(48.5) | 83(62.4) | 221(49.1) | 78(61.4) | 269(50.2) | 29(70.7) |
| Presence/absence of a caregiver2, [n(%)] |  |  | 0.907 |  |  | 0.906 |  |  | 0.356 |
| Absence of caregiver | 102(23.1) | 32(24.1) | 105(23.5) | 29(22.8) | 122(22.9) | 12(29.3) |
| Presence of caregiver | 339(76.9) | 101(75.9) | 341(76.5) | 98(77.2) | 410(77.1) | 29(70.7) |
| Socioeconomic status2,3, [n(%)] |  |  | 0.242 |  |  | 0.216 |  |  | 0.720 |
| < 6,000$ | 35(9.0) | 12(10.0) | 36(9.2) | 11(9.5) | 43(9.1) | 4(11.1) |
| 6,000-12,000$ | 125(32.3) | 50(41.7) | 126(32.3) | 49(42.2) | 160(34.0) | 15(41.7) |
| 12,000-15,000$ | 117(30.2) | 29(24.2) | 119(30.5) | 27(23.3) | 137(29.1) | 9(25.0) |
| >15,000$ | 110(28.4) | 29(24.2) | 109(27.9) | 29(25.0) | 131(27.8) | 8(22.2) |
| Educational Status2, [n(%)] |  |  | 0.001* |  |  | 0.001* |  |  | 0.001* |
| Illiterate | 12(2.8) | 9(7.0) | 12(2.7) | 9(7.3) | 16(5) | 5(12.8) |
| Attended School | 101(23.3) | 33(25.6) | 104(23.7) | 30(24.2) | 126(8) | 8(20.5) |
| Highschool Degree | 129(29.7) | 52(40.3) | 129(29.5) | 51(41.1) | 162(31.0) | 19(48.7) |
| University Degree | 192(44.2) | 35(27.1) | 193(44.1) | 34(27.4) | 219(41.9) | 7(17.9) |
| Admission Unit3, [n(%)] |  |  | <0.001* |  |  | <0.001* |  |  | 0.001* |
| Oncology | 27(6.1) | 19(14.6) | 27(6.1) | 19(15.3) | 37(7.0) | 8(19.5) |
| Internal medicine | 261(59.2) | 82(63.1) | 266(59.6) | 76(61.3) | 314(59.4) | 29(70.7) |
| Surgery | 112(25.4) | 28(21.5) | 112(25.1) | 28(22.6) | 136(25.7) | 4(9.8) |
| Others | 41(9.3) | 1(0.8) | 41(9.2) | 1(0.8) | 42(7.9) | 0(0.0) |
| Polypharmacy2, [n(%)] | 266(59.8) | 61(45.9) | 0.005* | 271(60.2) | 56(44.1) | 0.002* | 300(56.0) | 26(63.4) | 0.415 |
| <5 drugs/day |

| ≥ 5 drugs/day | 179(40.2) | 72(54.1) |  | 179(39.8) | 71(55.9) |  | 236(44.0) | 15(36.6) |  |
| --- | --- | --- | --- | --- | --- | --- | --- | --- | --- |
| Braden Score2, [n(%)] |  |  | 0.008* |  |  | 0.012* |  |  | 0.162 |
| No Risk | 278(66.8) | 66(53.7) | 281(66.7) | 63(53.8) | 323(64.6) | 20(52.6) |
| Risk (Mild, moderate, high and very high) | 138(33.2) | 57(46.3) | 140(33.3) | 54(46.2) | 177(35.4) | 18(47.4) |
| Pressure Ulcer2,3, [n(%)] |  |  | <0.001* |  |  | <0.001* |  |  | 0.006* |
| Absence of Pressure Ulcer | 418(99.3) | 110(88.0) | 423(99.3) | 104(87.4) | 493(97.4) | 34(87.2) |
| Presence of Pressure Ulcer | 3(0.7) | 15(12.0) | 3(0.7) | 15(12.6) | 13(2.6) | 5(12.8) |
| 1 Man-Whitney Test; 2Pearson Chi-Square; 3Fisher Exact  *statistical significance p<0.05 CCI, Charlson Comorbidity Index | | | | | | | | | |

Table 5. Logistic Regression Models of Malnutrition Risk-Factors with the Malnutrition Screening Tools: Mini Nutritional Assessment-Short Form (MNA-SF) or Nutrition Risk Screening 2002 (NRS-2002)

|  | Beta | OR | 95% CI | | p-value |
| --- | --- | --- | --- | --- | --- |
|  |  |  | Lower CI | Upper CI |  |
|  | **Model-1 (Cox and Snell=0.171)** | | | | |
| Age | 0.006 | 1.006 | 0.987 | 1.026 | 0.522 |
|  | **Model-2 (Cox and Snell=0.218)** | | | | |
| CCI | 0.333 | 1.395 | 1.225 | 1.589 | <0.0001* |
| Sex  Female | 1.008 | 2.741 | 1.583 | 4.744 | <0.0001* |
| Socioeconomic status (/year) 6000$-12000$  12000$-15000$  >15000$ |  |  |  |  | 0.814 |
| -0.064 | 0.938 | 0.380 | 2.314 | 0.889 |
| -0.228 | 0.796 | 0.295 | 2.150 | 0.653 |
| -0.401 | 0.669 | 0.238 | 1.885 | 0.447 |
| Educational status Attended school Highschool degree University degree |  |  |  |  | 0.062 |
| -0.402 | 0.669 | 0.192 | 2.333 | 0.528 |
| 0.444 | 1.559 | 0.436 | 5.571 | 0.494 |
| -0.201 | 0.818 | 0.209 | 3.197 | 0.772 |
| Admission Unit Internal Medicine Surgery  Others |  |  |  |  | 0.032* |
| -0.743 | 0.476 | 0.195 | 1.159 | 0.102 |
| -0.447 | 0.639 | 0.231 | 1.768 | 0.389 |
| -3.148 | 0.043 | 0.005 | 0.405 | 0.006* |
| Number of Medications | -0.165 | 0.848 | 0.705 | 1.019 | 0.079 |
| Polypharmacy  ≥ 5drugs/day | 0.547 | 1.728 | 0.712 | 4.198 | 0.227 |
| Braden Score-Pressure Ulcers Risk (Mild, moderate, high and  very high) | 0.264 | 1.302 | 0.734 | 2.309 | 0.367 |
| Pressure Ulcer  Presence of Pressure Ulcers | 2.597 | 13.418 | 2.926 | 61.543 | 0.001* |

*statistical significance p<0.05 CCI, Charlson Comorbodity Index
