# Supplementary material for: Identifying Malnutrition Risk Factors: A Comparative Analysis of Malnutrition Diagnostic Tools
Source: Research Square preprint supplement (doi:10.21203/rs.3.rs-7179279/v1), 2025-10-06
Supplement: Supplementary file 6 [file deda4c9bf4a0a14f500f187a.docx]

| Table 4. Logistic Regression of Malnutrition Risk-Factors with Global Leadership Initiative on Malnutrition (GLIM) | | | | | |
| --- | --- | --- | --- | --- | --- |
|  | Beta | OR | 95% CI | | p-value |
|  |  |  | Lower Limit | Upper Limit |  |
| **GLIM** | | | | | |
| **Model-1 (Cox and Snell=0.134)** | | | | | |
| Age | 0.003 | 1.003 | 0.986 | 1.020 | 0.749 |
| **Model-2 (Cox and Snell=0.167)** | | | | | |
| Sex  Females | 0.757 | 2.133 | 1.310 | 3.471 | 0.002* |
| Educational status  Attended school  Highschool degree  University degree |  |  |  |  | 0.245 |
| -0.668 | 0.513 | 0.165 | 1.593 | 0.248 |
| -0.219 | 0.803 | 0.264 | 2.449 | 0.700 |
| -0.694 | 0.500 | 0.158 | 1.582 | 0.238 |
| Admission Unit  Internal Medicine  Surgery  Others |  |  |  |  | 0.079 |
| -0.240 | 0.787 | 0.347 | 1.785 | 0.566 |
| -0.134 | 0.875 | 0.344 | 2.226 | 0.779 |
| -2.859 | 0.057 | 0.006 | 0.517 | 0.011* |
| CCI score | 0.251 | 1.285 | 1.148 | 1.439 | <0.001* |
| Number of Medications | -0.164 | 0.849 | 0.720 | 1.001 | 0.052 |
| Polypharmacy  ≥5 drugs/day | 0.584 | 1.793 | 0.812 | 3.961 | 0.149 |
| Braden Score  Risk (Mild, moderate, high and very high) | 0.156 | 1.169 | 0.698 | 1.956 | 0.553 |
| PU  Presence of PU | 2.590 | 13.325 | 3.049 | 58.235 | 0.001* |
| **GLIM-1** | | | | | |
| **Model-1 (Cox and Snell=0.134)** | | | | | |
| Age | 0.000 | 1.000 | 0.983 | 1.018 | 0.958 |
| **Model-2 (Cox and Snell=0.162)** | | | | | |
| Sex  Female | 0.701 | 2.015 | 1.230 | 3.302 | 0.005* |
| Educational status  Attended school  Highschool degree  University degree |  |  |  |  | 0.133 |
| -0.880 | 0.415 | 0.133 | 1.295 | 0.130 |
| -0.302 | 0.740 | 0.243 | 2.252 | 0.595 |
| -0.789 | 0.454 | 0.143 | 1.439 | 0.180 |
| Admission Unit  Internal Medicine  Surgery  Others |  |  |  |  | 0.070 |
| -0.344 | 0.709 | 0.059 | 0.352 | 0.409 |
| -0.115 | 0.892 | 0.313 | 0.006 | 0.809 |
| -2.836 | 0.059 | 0.006 | 0.531 | 0.012* |
| CCI score | 0.236 | 1.266 | 1.130 | 1.419 | <0.001* |
| Number of Medications | -0.143 | 0.867 | 0.734 | 1.023 | 0.091 |
| Polypharmacy  ≥5 drugs/day | 0.632 | 1.882 | 0.844 | 4.196 | 0.122 |
| Braden Score  Risk (Mild, moderate, high and very high) | 0.102 | 1.107 | 0.655 | 1.872 | 0.704 |
| PU  Presence of PU | 2.696 | 14.822 | 3.389 | 64.825 | <0.001* |
| **GLIM-2** | | | | | |
| **Model-1 (Cox and Snell=0.070)** | | | | | |
| Age | 0.019 | 1.020 | 0.992 | 1.048 | 0.171 |
| **Model-2 (Cox and Snell=0.074)** | | | | | |
| Sex  Female | 0.956 | 2.602 | 1.181 | 5.735 | 0.018* |
| Educational status  Attended school  Highschool degree  University degree |  |  |  |  | 0.206 |
| -1.086 | 0.338 | 0.084 | 1.362 | 0.127 |
| -0.485 | 0.616 | 0.164 | 2.309 | 0.472 |
| -1.226 | 0.293 | 0.067 | 1.293 | 0.105 |
| Admission Unit  Internal Medicine  Surgery  Others |  |  |  |  | 0.447 |
| -0.341 | 0.711 | 0.234 | 2.156 | 0.547 |
| -1.167 | 0.311 | 0.070 | 1.385 | 0.125 |
| -19.093 | 0.000 | - | - | 0.998 |
| CCI score | 0.164 | 1.179 | 1.005 | 1.382 | 0.043* |
| Braden Score  Risk (Mild, moderate, high and very high) | 0.266 | 1.304 | 0.576 | 2.953 | 0.524 |
| Pressure Ulcer  Presence of Pressure Ulcers | 1.064 | 2.898 | 0.716 | 11.730 | 0.136 |

*statistical significance p<0.05

CCI, Charlson Comorbidity Index
